# Supplementary material for: Palladium nanoparticles supported on ionic liquid modified, magnetic nanobeads – recyclable, high-capacity catalysts for alkene hydrogenation
Source: Royal Society of Chemistry journal article supplement (doi:10.1039/c3ra46946h), 2014-01-01
Supplement: c3ra46946h.pdf [file c3ra46946h.pdf]

# **Palladium Nanoparticles Supported on Ionic Liquid Modified, Magnetic Nanobeads – Recyclable, High-Capacity Catalysts for Alkene Hydrogenation**

Roland Linhardt,<sup>a</sup> Quirin M. Kainz,<sup>a</sup> Robert N. Grass,<sup>b</sup> Wendelin J. Stark<sup>b</sup> and Oliver Reiser<sup>\*a</sup>

<sup>a</sup> Institut für Organische Chemie, Universität Regensburg, Universitätsstr. 31, 93053 Regensburg, Germany. Fax: +49 941 943 4121; Tel: +49 941 943 4631; E-mail: [oliver.reiser@chemie.uni-regensburg.de](mailto:oliver.reiser@chemie.uni-regensburg.de)

<sup>b</sup> Institut für Chemie und Bioingenieurwissenschaften, Department Chemie und Angewandte Biowissenschaften, ETH Zürich, Wolfgang-Pauli-Str. 10, 8093 Zürich, Switzerland.

## **Supporting Information**

- 1. Materials and methods**
- 2. Nomenclature of the nanobeads**
- 3. GC data**
- 4. Preparation of samples for ICP-OES analysis**
- 5. IR spectra**
- 6. TEM pictures**
- 7. XRD measurements**
- 8. NMR spectra**
- 9. References**

## 1. Materials and methods

Carbon coated cobalt nanomagnets (Co/C, 20.5 m<sup>2</sup>/g, mean particle size ≈ 25 nm) were purchased from Turbobeeds Llc, Switzerland. Prior to use, they were washed in a concentrated HCl / water mixture (1:1) 5 times for 24 h. Acid residuals were removed by washing with millipore water (5x) and the particles were dried at 50°C in a vacuum oven.<sup>[1]</sup> All other commercially available compounds were used as received.

The magnetic nanobeads were dispersed using an ultrasound bath (Sonorex RK 255 H-R, Bandelin) and recovered with the aid of a neodymium based magnet (15 x 30 mm). They were characterized by IR-ATR spectroscopy (Biorad Excalibur FTS 3000), elemental microanalysis (LECO CHN-900), transmission electron microscopy (CM30 ST-Philips, LaB<sub>6</sub>cathode, operated at 300 kV point resolution ~ 4 Å), x-ray powder diffraction, and inductively coupled plasma optical emission spectrometry (Spectro Analytical Instruments ICP Modula EOP).

Poly(benzylchloride)styrene coated cobalt nanoparticles **5**<sup>[2]</sup> and benzyl-alcohol functionalized cobalt nanoparticles **7**<sup>[3]</sup> were prepared on the gram scale following previously reported procedures.

Pd<sub>2</sub>(dba)<sub>3</sub>·CHCl<sub>3</sub> was purchased (Sigma-Aldrich) and used as received. As determined by the procedure reported by Ananikov *et al.*<sup>[4]</sup>, the ratio of Pd<sub>2</sub>(dba)<sub>3</sub>:dba was 1:0.46, which reflects that 68% of the Pd content is present as Pd<sub>2</sub>(dba)<sub>3</sub>, while 32% of the Pd content are already present as Pd nanoparticles.

A solution of Na<sub>2</sub>PdCl<sub>4</sub> in water (conc. 1 mg Pd per mL) was freshly prepared by mixing PdCl<sub>2</sub> (1 eq.) with NaCl (2 eq.) in H<sub>2</sub>O using an ultrasound bath for 30 min.

NMR spectra were recorded with a Bruker AV 300 spectrometer with CHCl<sub>3</sub> as standard. Chemical shifts (δ) are reported in ppm and coupling constants (J) are reported in Hertz (Hz). The signals in the spectra are described as d (doublet), t (triplet), and m (multiplet).

Gas chromatography was recorded on Fisons Instruments GC8000 equipped with a capillary (30 m x 250 μm x 0.25 μm) and flame ionization detector.

## 2. Nomenclature of the nanobeads

The nomenclature of the nanobeads is as follows:

|                |                                                                                                   |
|----------------|---------------------------------------------------------------------------------------------------|
| Co/C           | carbon coated cobalt nanoparticles                                                                |
| PS-IL@Co/C     | poly(benzyl-methyl imidazolium chloride)styrene functionalized carbon coated cobalt nanoparticles |
| Bz-IL@Co/C     | benzyl-methyl imidazolium chloride functionalized carbon coated cobalt nanoparticles              |
| Spacer-IL@Co/C | benzamidopropyl-butyl-imidazolium bromide functionalized carbon coated cobalt nanoparticles       |
| IL@Co/C        | PS-IL@Co/C, Bz-IL@Co/C, and Spacer-IL@Co/C                                                        |
| Pd@PS-IL@Co/C  | Pd NPs deposited on PS-IL@Co/C                                                                    |
| Pd@Bz-IL@Co/C  | Pd NPs deposited on Bz-IL@Co/C                                                                    |

Pd@Spacer-IL@Co/C

Pd NPs deposited on Spacer-IL@Co/C

Pd@IL@Co/C

Pd NPs deposited on IL@Co/C

### 3. GC data

All products are literature-known and all spectroscopic data matched with those reported in the literature.

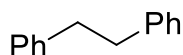

#### **1,2-Diphenylethane**<sup>[5]</sup>

1,2-Diphenylethane was prepared from *trans*-stilbene (360.5 mg, 2 mmol) according to the general procedure. The progress of the reaction was monitored by GC analysis: 140 °C (3 min), 20 °C/min, 300 °C;  $t_R$  = dodecane (3.54 min), 1,2-diphenylethane (7.66 min), *trans*-stilbene (9.37 min).

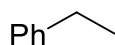

#### **Ethylbenzene**<sup>[6]</sup>

Ethylbenzene was prepared from styrene (228.9  $\mu$ L, 2 mmol) according to the general procedure. The progress of the reaction was monitored by GC analysis: 60 °C (3 min), 20 °C/min, 240 °C;  $t_R$  = ethylbenzene (4.29 min), styrene (4.65 min), dodecane (8.30 min).

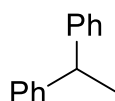

#### **Ethane-1,1-diyl dibenzene**<sup>[5]</sup>

Ethane-1,1-diyl dibenzene was prepared from ethane-1,1-diyl dibenzene (283.0  $\mu$ L, 2 mmol) according to the general procedure. The progress of the reaction was monitored by GC analysis: 140 °C (3 min), 16 °C/min, 300 °C;  $t_R$  = dodecane (3.49 min), ethane-1,1-diyl dibenzene (6.26 min), ethene-1,1-diyl dibenzene (6.47 min).

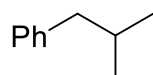

#### **Isobutylbenzene**<sup>[7]</sup>

Isobutylbenzene was prepared from (2-methylprop-1-en-1-yl)benzene (293.5  $\mu$ L, 2 mmol) according to the general procedure. The progress of the reaction was monitored by GC analysis: 60 °C (3 min), 24 °C/min, 300 °C;  $t_R$  = isobutylbenzene (6.01 min), (2-methylprop-1-en-1-yl)benzene (6.72 min), dodecane (7.80 min).

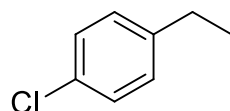

#### **1-Chloro-4-ethylbenzene**<sup>[6]</sup>

1-Chloro-4-ethylbenzene was prepared from 1-chloro-4-vinylbenzene (274.6  $\mu$ L, 2 mmol) according to the general procedure. The progress of the reaction was monitored by GC analysis: 100 °C (5 min), 25 °C/min, 300 °C;  $t_R$  = 1-chloro-4-ethylbenzene (4.51 min), 1-chloro-4-vinylbenzene (4.88 min), dodecane (7.12 min).

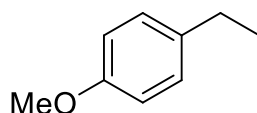

**1-Ethyl-4-methoxybenzene**<sup>[6]</sup>

1-Ethyl-4-methoxybenzene was prepared from 1-methoxy-4-vinylbenzene (269.2  $\mu$ L, 2 mmol) according to the general procedure. The progress of the reaction was monitored by GC analysis: 100 °C (5 min), 25 °C/min, 300 °C;  $t_R$  = 1-methoxy-4-vinylbenzene (4.90 min), 1-ethyl-4-methoxybenzene (5.64 min), dodecane (7.14 min).

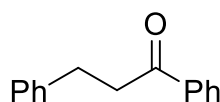

**1,3-Diphenylpropan-1-one**<sup>[5]</sup>

1,3-Diphenylpropan-1-one was prepared from chalcone (416.5 mg, 2 mmol) according to the general procedure. The progress of the reaction was monitored by GC analysis: 140 °C (3 min), 16 °C/min, 300 °C;  $t_R$  = dodecane (3.52 min), 1,3-diphenylpropan-1-one (9.19 min), chalcone (10.22 min). The selective hydrogenation of the C=C double bond was proved by <sup>1</sup>H NMR and <sup>13</sup>C NMR: <sup>1</sup>H NMR (300 MHz, CDCl<sub>3</sub>):  $\delta$  = 7.98 (d,  $J$  = 7.4 Hz, 2H), 7.57 (t,  $J$  = 7.3 Hz, 1H), 7.47 (t,  $J$  = 7.5 Hz, 2H), 7.41 – 7.14 (m, 5H), 3.32 (t,  $J$  = 7.6 Hz, 2H), 3.09 (t,  $J$  = 7.6 Hz, 2H); <sup>13</sup>C NMR (75 MHz, CDCl<sub>3</sub>):  $\delta$  = 199.3, 141.3, 136.9, 133.1, 128.7, 128.6, 128.5, 128.1, 126.2, 40.5, 30.2.

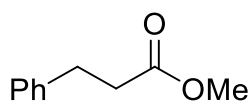

**Methyl-3-phenylpropanoate**<sup>[5]</sup>

Methyl-3-phenylpropanoate was prepared from methyl cinnamate (324.4 mg, 2 mmol) according to the general procedure. The progress of the reaction was monitored by GC analysis: 100 °C (3 min), 20 °C/min, 300 °C;  $t_R$  = dodecane (5.95 min), methyl-3-phenylpropanoate (6.47 min), methyl cinnamate (7.43 min).

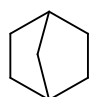

**Bicyclo[2.2.1]heptanes**<sup>[8]</sup>

Bicyclo[2.2.1]heptane was prepared from norbornene (188.3 mg, 2 mmol) according to the general procedure. The progress of the reaction was monitored by GC analysis: 60 °C (3 min), 30 °C/min, 300 °C;  $t_R$  = norbornene (2.53 min), bicyclo[2.2.1]heptane (2.87 min), dodecane (7.27 min).

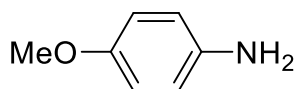

**4-Methoxyaniline**<sup>[9]</sup>

4-Methoxyaniline was prepared from 1-methoxy-4-nitrobenzene (306.3 mg, 2 mmol) according to the general procedure. The progress of the reaction was monitored by GC analysis: 70 °C (3 min), 13 °C/min, 200 °C;  $t_R$  = 4-methoxyaniline (8.81 min), dodecane (9.01 min), 1-methoxy-4-nitrobenzene (10.92 min).

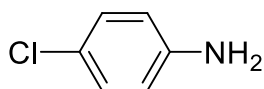

#### 4-Chloraniline<sup>[9]</sup>

4-Chloraniline was prepared from 1-chloro-4-nitrobenzene (315.1 mg, 2 mmol) according to the general procedure. The progress of the reaction was monitored by GC analysis: 50 °C (3 min), 5 °C/min, 170 °C;  $t_R$  = 4-chloroaniline (15.73 min), 1-chloro-4-nitrobenzene (16.64 min), dodecane (16.91 min).

## 4. Preparation of samples for ICP-OES analysis

### General procedure for the preparation of Pd samples to determine the Pd amount on Pd@Co/C catalysts

5.0 mg Pd@Co/C were heated in 3.2 mL aqua regia for 30 min. Upon cooling, the mixture was diluted with H<sub>2</sub>O (millipore grade) and after collecting the particles with an external magnet the solution was filtrated in a 10 mL measuring flask. After washing the particles for three times with H<sub>2</sub>O with subsequent filtration the measuring flask was filled to 10 mL. The Pd concentration was then determined by ICP-OES analysis.

### General procedure for the preparation of Pd and Co samples to determine the Pd and Co amount in hydrogenated products

250.0 mg 1,2-Diphenylethane was heated in 3.2 mL aqua regia for 30 min. Upon cooling, the mixture was diluted with H<sub>2</sub>O (millipore grade) and filtrated in a 10 mL measuring flask. After washing the vial for three times with H<sub>2</sub>O with subsequent filtration the measuring flask was filled to 10 mL. The Pd and Co concentration was then determined by ICP-OES analysis.

## 5. IR spectra

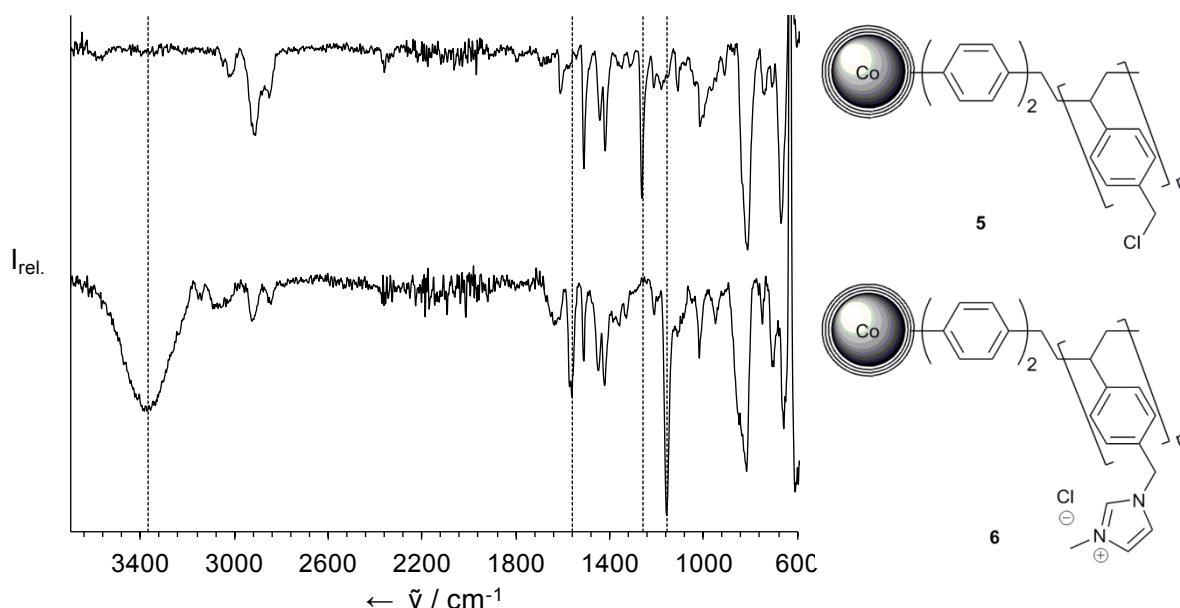

**Figure S1.** Example for following the reaction progress of the nanoparticle synthesis by IR spectroscopy. IR spectra of PS-Cl@Co/C **5** and PS-IL@Co/C **6** are shown.

## 6. TEM pictures

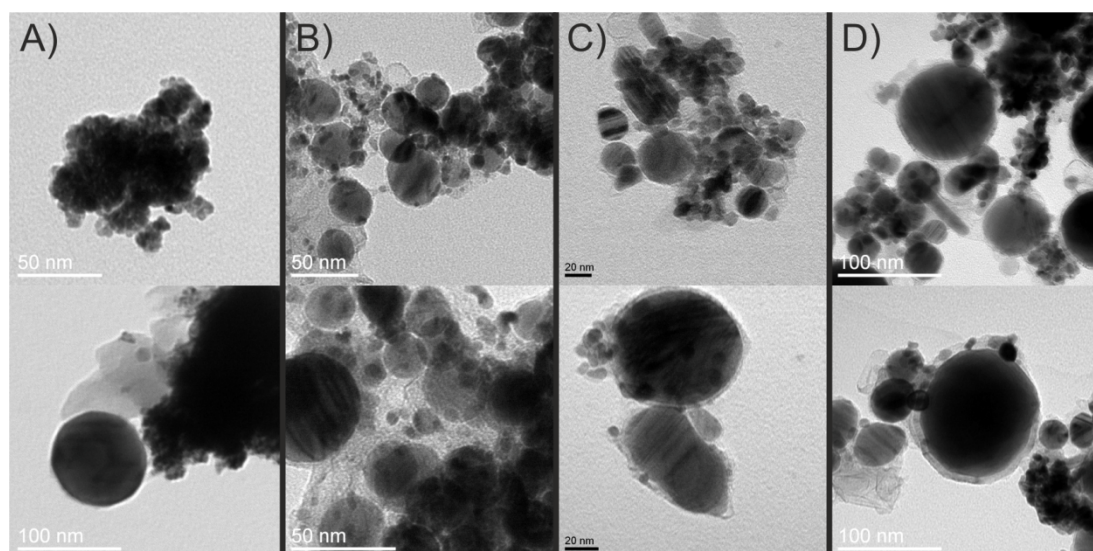

**Figure S2.** Transmission electron microscopy (TEM) pictures of A) Pd@PS-IL@Co/C **2b** (24 wt%), B) Pd@Bz-IL@Co/C **3b** (31 wt%), C) Pd@Spacer-IL@Co/C **4b** (34 wt%), and D) Pd@Spacer-IL@Co/C **4b** (34 wt%) after 12 cycles. Carbon coated cobalt nanoparticles have a diameter of 20-100 nm, while the Pd-NPs on the surface of the carbon coated cobalt nanoparticles have a diameter of 5-15 nm.

## 7. XRD measurements

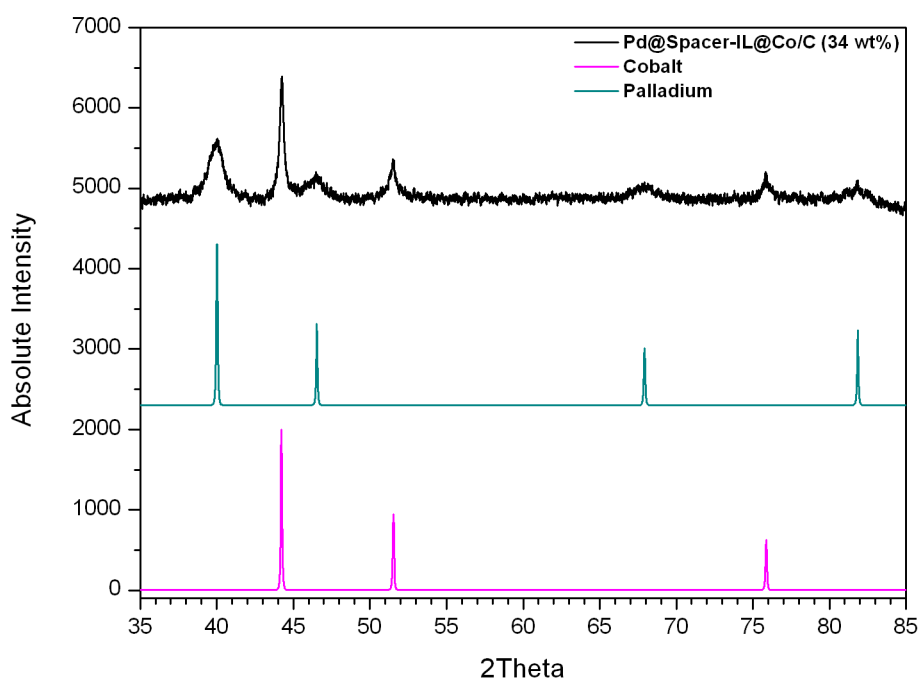

**Figure S3.** X-ray diffraction spectrum of Pd@Spacer-IL@Co/C **4b** with a palladium content of 34 wt%. The characteristic peaks for Co and Pd are detected.

## 8. NMR spectra

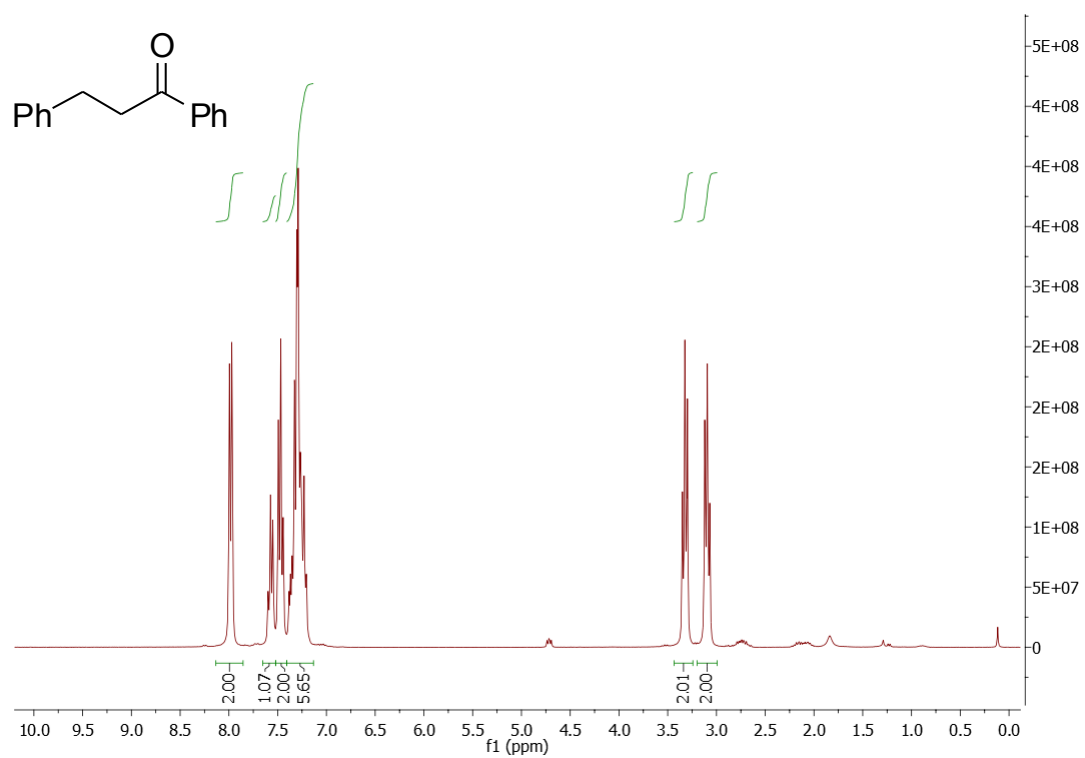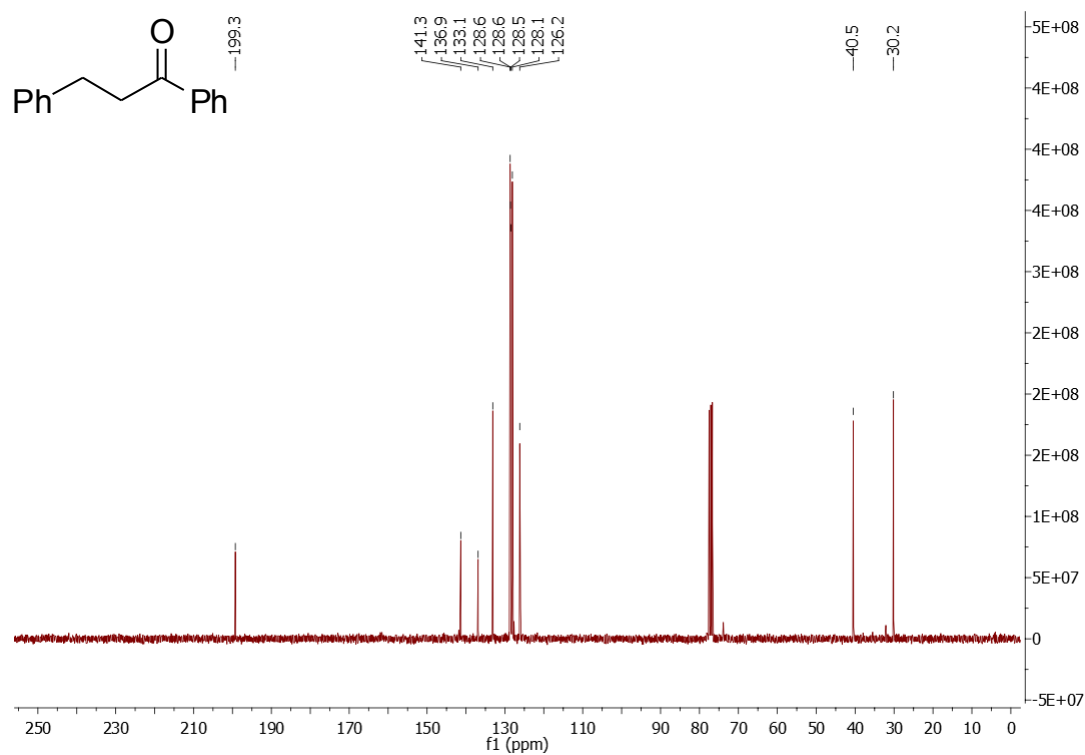

## 9. References

- [1] M. Rossier, F. M. Koehler, E. K. Athanassiou, R. N. Grass, B. Aeschlimann, D. Günther and W. J. Stark, *J. Mater. Chem.*, 2009, 19(43), 8239.
- [2] A. Schaetz, M. Zeltner, T. D. Michl, M. Rossier, R. Fuhrer and W. J. Stark, *Chem. Eur. J.*, 2011, 17(38), 10566.
- [3] A. Schätz, R. N. Grass, W. J. Stark and O. Reiser, *Chem. Eur. J.*, 2008, 14(27), 8262.
- [4] S. S. Zalesskiy and V. P. Ananikov, *Organometallics*, 2012, 31(6), 2302.
- [5] F.-X. Felpin and E. Fouquet, *Chem. Eur. J.*, 2010, 16(41), 12440.
- [6] D. J. Frank, L. Guiet, A. Käslin, E. Murphy and S. P. Thomas, *RSC Adv.*, 2013, 3(48), 25698.
- [7] Y. S. Chun, J. Y. Shin, C. E. Song and S.-g. Lee, *Chem. Commun.*, 2008(8), 942.
- [8] B. Nguyen and J. M. Brown, *Adv. Synth. Catal.*, 2009, 351(9), 1333.
- [9] E. Vasilikogiannaki, C. Gryparis, V. Kotzabasaki, I. N. Lykakis and M. Stratakis, *Adv. Synth. Catal.*, 2013, 355(5), 907.
